# Supplementary material for: Phytochemical Analysis and Antiproliferative Activity of Ulex gallii Planch. (Fabaceae), a Medicinal Plant from Galicia (Spain)
Source: MDPI journal article supplement (doi:10.3390/molecules28010351), 2023-01-01
Supplement: s1 [file s1]

# Phytochemical Analysis and Antiproliferative Activity of *Ulex gallii* Planch. (Fabaceae), a Medicinal Plant from Galicia (Spain)

Lucía Bada <sup>1,2</sup>, Renato B. Pereira <sup>3</sup>, David M. Pereira <sup>3,\*</sup>, Marta Lores <sup>4</sup>, María Celeiro <sup>5</sup>, Elías Quezada <sup>6</sup>, Eugenio Uriarte <sup>6,7</sup>, José Gil-Longo <sup>2</sup> and Dolores Viña <sup>1,2,\*</sup>

<sup>1</sup> Group of Pharmacology of Chronic Diseases (CD Pharma), Molecular Medicine and Chronic Diseases Research Centre (CIMUS), Universidade de Santiago de Compostela, 15782-Santiago de Compostela, Spain

<sup>2</sup> Department of Pharmacology, Pharmacy and Pharmaceutical Technology, Faculty of Pharmacy, Universidade de Santiago de Compostela, 15782-Santiago de Compostela, Spain

<sup>3</sup> REQUIMTE/LAQV, Laboratório de Farmacognosia, Departamento de Química, Faculdade de Farmácia, Universidade do Porto, 4050-313 Porto, Portugal

<sup>4</sup> Laboratory of Research and Development of Analytical Solutions (LIDSA), Department of Analytical Chemistry, Nutrition and Food Science, Faculty of Chemistry, Universidade de Santiago de Compostela, 15782-Santiago de Compostela, Spain

<sup>5</sup> CRETUS Institute, Department of Analytical Chemistry, Nutrition and Food Science, Campus Vida, Universidade de Santiago de Compostela, 15782-Santiago de Compostela, Spain

<sup>6</sup> Department of Organic Chemistry, Faculty of Pharmacy, Universidade de Santiago de Compostela, 15782-Santiago de Compostela, Spain

<sup>7</sup> Instituto de Ciencias Químicas Aplicadas, Universidad Autónoma de Chile, 7500912 Santiago, Chile

\* Correspondence: dpereira@ff.up.pt (D.M.P.); mdolores.vina@usc.es (D.V.); Tel.: +35-122-042-8655 (D.M.P.); +34-881-815-424 (D.V.)

---

**Table S1.** Database of flavonoids present in *Ulex* species.

| Metabolite                 | Formula                                         | Type                        | Mode               | Ion                                                          | Collision Energy | <i>m/z</i>                                                                                  | Relative intensity                                                    | Database                                         | Reference                                                                                                                                                                                                                                    |
|----------------------------|-------------------------------------------------|-----------------------------|--------------------|--------------------------------------------------------------|------------------|---------------------------------------------------------------------------------------------|-----------------------------------------------------------------------|--------------------------------------------------|----------------------------------------------------------------------------------------------------------------------------------------------------------------------------------------------------------------------------------------------|
| Isowighteone               | C <sub>20</sub> H <sub>18</sub> O <sub>5</sub>  | LC-ESI-QTOF                 | [M-H] <sup>-</sup> | C <sub>20</sub> H <sub>17</sub> O <sub>5</sub> <sup>-</sup>  | 10 eV<br>20 eV   | 177.0188, 319.0970, 337.1076/<br>177.0188, 295.0970, 307.0970, 319.0970, 337.1076           | 2.7847, 3.68867, 86.9560/<br>44.8500, 2.2009, 4.2065, 3.2897, 48.8165 | HMDB<br>(Predicted)                              | <a href="https://hmdb.ca/spectra/ms_ms/158859">https://hmdb.ca/spectra/ms_ms/158859</a><br><a href="https://hmdb.ca/spectra/ms_ms/158860">https://hmdb.ca/spectra/ms_ms/158860</a>                                                           |
| Limonianin                 | C <sub>20</sub> H <sub>16</sub> O <sub>5</sub>  | LC-ESI-QTOF                 | [M-H] <sup>-</sup> | C <sub>20</sub> H <sub>15</sub> O <sub>5</sub> <sup>-</sup>  | 10 eV<br>20 eV   | 217.0501, 309.0763, 317.0814, 335.0919/<br>191.0708, 251.0344, 319.0606, 335.0919           | 0.6327, 0.8304, 0.5542, 94.8013/<br>2.0200, 5.5959, 2.2507, 74.3874   | HMDB<br>(Predicted)                              | <a href="https://hmdb.ca/spectra/ms_ms/155106">https://hmdb.ca/spectra/ms_ms/155106</a><br><a href="https://hmdb.ca/spectra/ms_ms/155107">https://hmdb.ca/spectra/ms_ms/155107</a>                                                           |
| Isopruneitin               | C <sub>16</sub> H <sub>12</sub> O <sub>5</sub>  | LC-ESI-QTOF                 | [M-H] <sup>-</sup> | C <sub>16</sub> H <sub>11</sub> O <sub>5</sub> <sup>-</sup>  | 20V              | 196.0486, 240.0427, 268.0371, 283.0608                                                      | 7.2022, 92.7647, 95.2782, 100.0000                                    | MoNA<br>(Experimental)                           | <a href="https://mona.fiehnlab.ucdavis.edu/spectra/display/VF-NPL-QTOF004611">https://mona.fiehnlab.ucdavis.edu/spectra/display/VF-NPL-QTOF004611</a>                                                                                        |
| Dihydromyricetin           | C <sub>15</sub> H <sub>12</sub> O <sub>8</sub>  | LC-ESI-QTOF                 | [M-H] <sup>-</sup> | C <sub>15</sub> H <sub>11</sub> O <sub>8</sub> <sup>-</sup>  | 10 eV<br>20 eV   | 151.0032, 153.0188, 301.0348, 319.0454/<br>125.0239, 151.0031, 301.0348, 319.0454           | 7.2372, 3.1921, 3.0270, 67.0856/<br>7.6694, 15.6284, 4.6647, 25.8881  | HMDB<br>(Predicted)                              | <a href="https://hmdb.ca/spectra/ms_ms/22583">https://hmdb.ca/spectra/ms_ms/22583</a><br><a href="https://hmdb.ca/spectra/ms_ms/22584">https://hmdb.ca/spectra/ms_ms/22584</a>                                                               |
| Genistein                  | C <sub>15</sub> H <sub>10</sub> O <sub>5</sub>  | LC-ESI-QTOF<br>LC-ESI-ITTOF | [M-H] <sup>-</sup> | C <sub>15</sub> H <sub>9</sub> O <sub>5</sub> <sup>-</sup>   | 10 eV<br>20 eV   | 133.0274, 181.0631, 201.0554, 269.04355<br>269.0400, 269.3396, 270.0498, 271.0455, 540.1046 | 5.6, 2.7, 1.5, 100/<br>1.906, 5.2535, 3.7033, 4.5508, 19.4843         | MoNA<br>(Experimental)<br>HMDB<br>(Experimental) | <a href="https://mona.fiehnlab.ucdavis.edu/spectra/display/RIKENPlasma005451">https://mona.fiehnlab.ucdavis.edu/spectra/display/RIKENPlasma005451</a><br><a href="https://hmdb.ca/spectra/ms_ms/6394">https://hmdb.ca/spectra/ms_ms/6394</a> |
| Quercetin 3,7-diglucoside  | C <sub>27</sub> H <sub>30</sub> O <sub>17</sub> | LC-ESI-QTOF                 | [M-H] <sup>-</sup> | C <sub>27</sub> H <sub>29</sub> O <sub>17</sub> <sup>-</sup> | 30 eV            | 301.0000, 463.000, 505.0000                                                                 | 20.00, 100.00, 10.00                                                  | MoNA<br>(Experimental)                           | <a href="https://mona.fiehnlab.ucdavis.edu/spectra/display/PM016302">https://mona.fiehnlab.ucdavis.edu/spectra/display/PM016302</a>                                                                                                          |
| Isopruneitin-7-O-glucoside | C <sub>22</sub> H <sub>22</sub> O <sub>10</sub> | LC-ESI-QTOF                 | [M-H] <sup>-</sup> | C <sub>22</sub> H <sub>21</sub> O <sub>10</sub> <sup>-</sup> | -                | 282.0514, 283.0586, 445.1175                                                                | 100.0000, 82.9099, 4.0310                                             | MoNA<br>(Experimental)                           | <a href="https://mona.fiehnlab.ucdavis.edu/spectra/display/VF-NPL-QTOF005060">https://mona.fiehnlab.ucdavis.edu/spectra/display/VF-NPL-QTOF005060</a>                                                                                        |
| Neoisoliquiritin           | C <sub>21</sub> H <sub>22</sub> O <sub>9</sub>  | LC-ESI-QTOF                 | [M-H] <sup>-</sup> | C <sub>21</sub> H <sub>21</sub> O <sub>9</sub> <sup>-</sup>  | 10 eV<br>20 eV   | 119.0497, 237.0552, 255.0657, 417.1186<br>119.0497, 237.0552, 255.0657, 417.1186            | 3.8957, 4.1872, 21.2357, 31.6361<br>5.8093, 6.4842, 37.4759, 4.5595   | HMDB<br>(Predicted)                              | <a href="https://hmdb.ca/spectra/ms_ms/137952">https://hmdb.ca/spectra/ms_ms/137952</a><br><a href="https://hmdb.ca/spectra/ms_ms/137953">https://hmdb.ca/spectra/ms_ms/137953</a>                                                           |
| Daidzein                   | C <sub>15</sub> H <sub>10</sub> O <sub>4</sub>  | UHPLC-ESI-QTOF              | [M-H] <sup>-</sup> | C <sub>15</sub> H <sub>9</sub> O <sub>4</sub> <sup>-</sup>   | 30 eV            | 223.0453, 224.0506, 253.0501, 253.3113                                                      | 12.21, 11.81, 100.00, 8.71                                            | HMDB<br>(Experimental)                           | <a href="https://hmdb.ca/spectra/ms_ms/5886">https://hmdb.ca/spectra/ms_ms/5886</a>                                                                                                                                                          |
| Inermin                    | C <sub>16</sub> H <sub>12</sub> O <sub>5</sub>  | LC-ESI-QTOF                 | [M-H] <sup>-</sup> | C <sub>16</sub> H <sub>11</sub> O <sub>5</sub> <sup>-</sup>  | 10 eV<br>20 eV   | 237.0552, 253.0501, 265.0501, 283.0606<br>237.0551, 253.0500, 265.0500, 283.0606            | 2.3492, 2.7754, 1.2463, 88.7910<br>7.7075, 13.6947, 6.7467, 54.4447   | HMDB<br>(Predicted)                              | <a href="https://hmdb.ca/spectra/ms_ms/22295">https://hmdb.ca/spectra/ms_ms/22295</a><br><a href="https://hmdb.ca/spectra/ms_ms/22296">https://hmdb.ca/spectra/ms_ms/22296</a>                                                               |

|                           |                                                 |             |                       |                                                              |                |                                                                                  |                                                                       |                                                |                                                                                                                                                                                                                                                                                                                                            |
|---------------------------|-------------------------------------------------|-------------|-----------------------|--------------------------------------------------------------|----------------|----------------------------------------------------------------------------------|-----------------------------------------------------------------------|------------------------------------------------|--------------------------------------------------------------------------------------------------------------------------------------------------------------------------------------------------------------------------------------------------------------------------------------------------------------------------------------------|
| Formononetin              | C <sub>16</sub> H <sub>12</sub> O <sub>4</sub>  | LC-ESI-QTOF | [M-H] <sup>-</sup>    | C <sub>16</sub> H <sub>11</sub> O <sub>4</sub> <sup>-</sup>  | 10 eV          | 223.409, 251.0328, 252.0426, 267.0662                                            | 1.4404, 30.8938, 100.0000                                             | MoNA (Experimental)                            | <a href="https://mona.fiehnlab.ucdavis.edu/spectra/display/VF-NPL-QTOF007716">https://mona.fiehnlab.ucdavis.edu/spectra/display/VF-NPL-QTOF007716</a>                                                                                                                                                                                      |
| Genistin                  | C <sub>21</sub> H <sub>20</sub> O <sub>10</sub> | LC-ESI-QTOF | [M-H] <sup>-</sup>    | C <sub>21</sub> H <sub>19</sub> O <sub>10</sub> <sup>-</sup> | 10 eV<br>20 eV | 103.0395, 269.0450, 413.0872, 431.0978<br>73.0290, 269.0450, 413.0873, 431.0978  | 3.1718, 28.8188, 3.7217, 38.9856<br>3.1659, 7.4359, 3.5405, 5.7824    | HMDB (Predicted)                               | <a href="https://hmdb.ca/spectra/ms_ms/19073">https://hmdb.ca/spectra/ms_ms/19073</a><br><a href="https://hmdb.ca/spectra/ms_ms/19074">https://hmdb.ca/spectra/ms_ms/19074</a>                                                                                                                                                             |
| Soyasapogenol B           | C <sub>30</sub> H <sub>50</sub> O <sub>3</sub>  | LC-ESI-QTOF | [M-H] <sup>-</sup>    | C <sub>30</sub> H <sub>49</sub> O <sub>3</sub> <sup>-</sup>  | 10 eV<br>20 eV | 421.3470, 427.3576, 439.3576, 457.3682<br>427.3576, 439.3576, 441.3368, 457.3681 | 4.2356, 5.0888, 23.4589, 51.2316<br>4.0092, 27.7025, 1.1133, 21.81467 | HMDB (Predicted)                               | <a href="https://hmdb.ca/spectra/ms_ms/164916">https://hmdb.ca/spectra/ms_ms/164916</a><br><a href="https://hmdb.ca/spectra/ms_ms/164917">https://hmdb.ca/spectra/ms_ms/164917</a>                                                                                                                                                         |
| Resokaempferol            | C <sub>15</sub> H <sub>10</sub> O <sub>5</sub>  | LC-ESI-QTOF | [M-H] <sup>-</sup>    | C <sub>15</sub> H <sub>15</sub> O <sub>5</sub> <sup>-</sup>  | 10 eV<br>20 eV | 269.0449, 270.0476, 271.0469<br>224.0447, 239.0320, 269.0408, 270.436            | 100.00, 12.61, 1.70<br>1.70, 2.30, 100.00, 10.41                      | HMDB (Experimental)                            | <a href="https://hmdb.ca/spectra/ms_ms/373875">https://hmdb.ca/spectra/ms_ms/373875</a><br><a href="https://hmdb.ca/spectra/ms_ms/373876">https://hmdb.ca/spectra/ms_ms/373876</a>                                                                                                                                                         |
| Luteolin-4-O-glucoside    | C <sub>21</sub> H <sub>20</sub> O <sub>11</sub> | LC-ESI-QTOF | [M-H] <sup>-</sup>    | C <sub>21</sub> H <sub>19</sub> O <sub>11</sub> <sup>-</sup> | 10 eV          | 285.0388, 286.0418, 287.0416, 441.0925                                           | 100.00, 17.80, 2.60, 68.20                                            | MoNA (Predicted)                               | <a href="https://mona.fiehnlab.ucdavis.edu/spectra/display/RIKENPlasma005697">https://mona.fiehnlab.ucdavis.edu/spectra/display/RIKENPlasma005697</a>                                                                                                                                                                                      |
| Luteolin-7-O-glucoside    | C <sub>21</sub> H <sub>20</sub> O <sub>11</sub> | LC-ESI-QTOF | [M+FA-H] <sup>-</sup> | C <sub>21</sub> H <sub>19</sub> O <sub>11</sub> <sup>-</sup> | 10 eV          | 284.0297, 284.0559, 285.0418, 447.0932                                           | 15.0847, 12.4764, 23.7698, 100.0000                                   | MoNA (Experimental)                            | <a href="https://mona.fiehnlab.ucdavis.edu/spectra/display/CCMSLIB00000846983">https://mona.fiehnlab.ucdavis.edu/spectra/display/CCMSLIB00000846983</a>                                                                                                                                                                                    |
| Quercetin-O-glucoside     | C <sub>21</sub> H <sub>20</sub> O <sub>12</sub> | LC-ESI-QTOF | [M-H] <sup>-</sup>    | C <sub>21</sub> H <sub>19</sub> O <sub>11</sub> <sup>-</sup> | -              | 255.0274, 271.0261, 300.0258, 301.0351, 463.0889                                 | 10.39, 23.35, 100.00, 87.02, 98.06                                    | HMDB (Experimental)                            | <a href="https://hmdb.ca/spectra/ms_ms/440558">https://hmdb.ca/spectra/ms_ms/440558</a>                                                                                                                                                                                                                                                    |
| Eriodictyol 7-O-glucoside | C <sub>21</sub> H <sub>22</sub> O <sub>11</sub> | LC-ESI-QTOF | [M-H] <sup>-</sup>    | C <sub>21</sub> H <sub>21</sub> O <sub>11</sub> <sup>-</sup> | 10 eV          | 287.0533, 288.0582, 289.0566, 449.1077                                           | 100.00, 15.40, 2.40, 23.30                                            | MoNA (Experimental)                            | <a href="https://mona.fiehnlab.ucdavis.edu/spectra/display/RIKENPlasma006155">https://mona.fiehnlab.ucdavis.edu/spectra/display/RIKENPlasma006155</a>                                                                                                                                                                                      |
| Rutin                     | C <sub>27</sub> H <sub>30</sub> O <sub>16</sub> | LC-ESI-QTOF | [M-H] <sup>-</sup>    | C <sub>27</sub> H <sub>29</sub> O <sub>16</sub> <sup>-</sup> | 10 eV<br>20 eV | 163.0606, 301.0348, 591.1349, 609.1455<br>272.0281, 301.0344, 609.1456           | 6.3662, 18.8843, 6.0445, 20.6713<br>16.00, 91.00, 99.00               | HMDB (Predicted)<br>MassBank EU (Experimental) | <a href="https://hmdb.ca/spectra/ms_ms/273297">https://hmdb.ca/spectra/ms_ms/273297</a><br><a href="https://massbank.eu/MassBank/RecordDisplay?id=MSBNK-Washington_State_Univ-BML00141&amp;dsn=Washington_State_Univ">https://massbank.eu/MassBank/RecordDisplay?id=MSBNK-Washington_State_Univ-BML00141&amp;dsn=Washington_State_Univ</a> |
| Liquiritin                | C <sub>21</sub> H <sub>22</sub> O <sub>9</sub>  | LC-ESI-QTOF | [M-H] <sup>-</sup>    | C <sub>21</sub> H <sub>21</sub> O <sub>8</sub> <sup>-</sup>  | 10 eV<br>20 eV | 237.0551, 255.0657, 399.1079, 417.1185<br>161.0449, 237.0551, 255.0865, 417.1186 | 4.5417, 24.9801, 3.3249, 34.4403<br>3.5209, 5.8702, 43.2606, 4.9646   | HMDB (Experimental)                            | <a href="https://hmdb.ca/spectra/ms_ms/168057">https://hmdb.ca/spectra/ms_ms/168057</a><br><a href="https://hmdb.ca/spectra/ms_ms/168058">https://hmdb.ca/spectra/ms_ms/168058</a>                                                                                                                                                         |
| Apigenin 4-O-glucoside    | C <sub>21</sub> H <sub>20</sub> O <sub>10</sub> | LC-ESI-QTOF | [M+FA-H] <sup>-</sup> | C <sub>21</sub> H <sub>19</sub> O <sub>10</sub> <sup>-</sup> | 20 eV          | 268.0384, 269.0450, 431.0997                                                     | 17.6810, 91.3639, 100.0000                                            | MoNA (Experimental)                            | <a href="https://mona.fiehnlab.ucdavis.edu/spectra/display/CCMSLIB00000847310">https://mona.fiehnlab.ucdavis.edu/spectra/display/CCMSLIB00000847310</a>                                                                                                                                                                                    |
| Apigenin 7-O-glucoside    | C <sub>21</sub> H <sub>20</sub> O <sub>10</sub> | LC-ESI-QTOF | [M-H] <sup>-</sup>    | C <sub>21</sub> H <sub>19</sub> O <sub>11</sub> <sup>-</sup> | 10 eV<br>20 eV | 103.0395, 269.0449, 413.0872, 431.0978                                           | 3.0945, 27.6401, 9.3458, 37.5765                                      | HMDB (Predicted)                               | <a href="https://hmdb.ca/spectra/ms_ms/148638">https://hmdb.ca/spectra/ms_ms/148638</a>                                                                                                                                                                                                                                                    |

|                          |                                                 |                    |                    |                                                              |               |                                                              |                                             |                                   |                                                                                                                                                                                         |
|--------------------------|-------------------------------------------------|--------------------|--------------------|--------------------------------------------------------------|---------------|--------------------------------------------------------------|---------------------------------------------|-----------------------------------|-----------------------------------------------------------------------------------------------------------------------------------------------------------------------------------------|
|                          |                                                 |                    |                    |                                                              |               | 251.0344, 269.0449,<br>413.0872, 431.0978                    | 3.2514, 55.1915, 6.6065,<br>5.8183          |                                   | <a href="https://hmdb.ca/spectra/ms_ms/148639">https://hmdb.ca/spectra/ms_ms/148639</a>                                                                                                 |
| Kaempferol-5-O-glucoside | C <sub>21</sub> H <sub>20</sub> O <sub>11</sub> | LC-ESI-QTOF        | [M-H] <sup>-</sup> | C <sub>21</sub> H <sub>19</sub> O <sub>11</sub> <sup>-</sup> | 10 eV<br>20eV | 267.0293, 285.0399,<br>429.0821, 447.0927                    | 4.2709, 24.7430, 8.0195,<br>33.3460         | HMDB                              | <a href="https://hmdb.ca/spectra/ms_ms/158397">https://hmdb.ca/spectra/ms_ms/158397</a>                                                                                                 |
|                          |                                                 |                    |                    |                                                              |               | 161.0449, 267.0293,<br>285.0399, 429.0821                    | 3.5939, 6.0272, 45.6949,<br>5.1339          | (Predicted)                       | <a href="https://hmdb.ca/spectra/ms_ms/158398">https://hmdb.ca/spectra/ms_ms/158398</a>                                                                                                 |
| Formononetin-O-glucoside | C <sub>22</sub> H <sub>22</sub> O <sub>9</sub>  | LC-ESI-QTOF        | [M-H] <sup>-</sup> | C <sub>22</sub> H <sub>21</sub> O <sub>9</sub> <sup>-</sup>  | 10 eV<br>20eV | 103.0395, 267.0657,<br>411.1079, 429.1185                    | 3.1818, 28.4173, 7.3022,<br>38.9445         | HMDB                              | <a href="https://hmdb.ca/spectra/ms_ms/17537">https://hmdb.ca/spectra/ms_ms/17537</a>                                                                                                   |
|                          |                                                 |                    |                    |                                                              |               | 237.0551, 267.0657,<br>411.1079, 429.1185                    | 5.8294, 52.7782, 5.6049,<br>5.6364          | (Predicted)                       | <a href="https://hmdb.ca/spectra/ms_ms/17538">https://hmdb.ca/spectra/ms_ms/17538</a>                                                                                                   |
| Kaempferol               | C <sub>15</sub> H <sub>10</sub> O <sub>6</sub>  | UHPLC<br>-ESI-QTOF | [M-H] <sup>-</sup> | C <sub>15</sub> H <sub>9</sub> O <sub>5</sub> <sup>-</sup>   | -             | 119.0343, 164.9985, 285.0399                                 | 79.4299, 38.6044, 33.5242                   | HMDB<br>(Experimental)            | <a href="https://hmdb.ca/spectra/ms_ms/6081">https://hmdb.ca/spectra/ms_ms/6081</a>                                                                                                     |
| Naringenin               | C <sub>15</sub> H <sub>12</sub> O <sub>5</sub>  | UHPLC<br>-ESI-QTOF | [M-H] <sup>-</sup> | C <sub>15</sub> H <sub>11</sub> O <sub>5</sub> <sup>-</sup>  | -             | 93.0339, 119.0501, 151.0038,<br>271.0606                     | 7.61, 60.76, 60.06, 100.00                  | HMDB<br>(Experimental)            | <a href="https://hmdb.ca/spectra/ms_ms/5790">https://hmdb.ca/spectra/ms_ms/5790</a>                                                                                                     |
| Apigenin                 | C <sub>15</sub> H <sub>10</sub> O <sub>5</sub>  | LC-ESI-QTOF        | [M-H] <sup>-</sup> | C <sub>15</sub> H <sub>9</sub> O <sub>5</sub> <sup>-</sup>   | 10 eV<br>20eV | 269.0458, 270.0491, 271.0507<br>151.0035, 227.0350, 269.0461 | 29.184, 4.562, 6.100<br>1.222, 3.906, 6.014 | MassBank.<br>EU<br>(Experimental) | <a href="https://massbank.eu/MassBank/RecordDisplay?id=MSBNK-Fiocruz-FIO00011&amp;dsn=Fiocruz">https://massbank.eu/MassBank/RecordDisplay?id=MSBNK-Fiocruz-FIO00011&amp;dsn=Fiocruz</a> |
| Liquiritigenin           | C <sub>15</sub> H <sub>12</sub> O <sub>4</sub>  | LC-ESI-QTOF        | [M-H] <sup>-</sup> | C <sub>15</sub> H <sub>11</sub> O <sub>4</sub> <sup>-</sup>  | 10 eV         | 119.0520, 135.0123,<br>255.0697, 255.2351                    | 50.5431, 69.5440, 100.0000,<br>21.7868      | MoNA<br>(Experimental)            | <a href="https://mona.fiehnlab.ucdavis.edu/spectra/display/MoNA018159">https://mona.fiehnlab.ucdavis.edu/spectra/display/MoNA018159</a>                                                 |

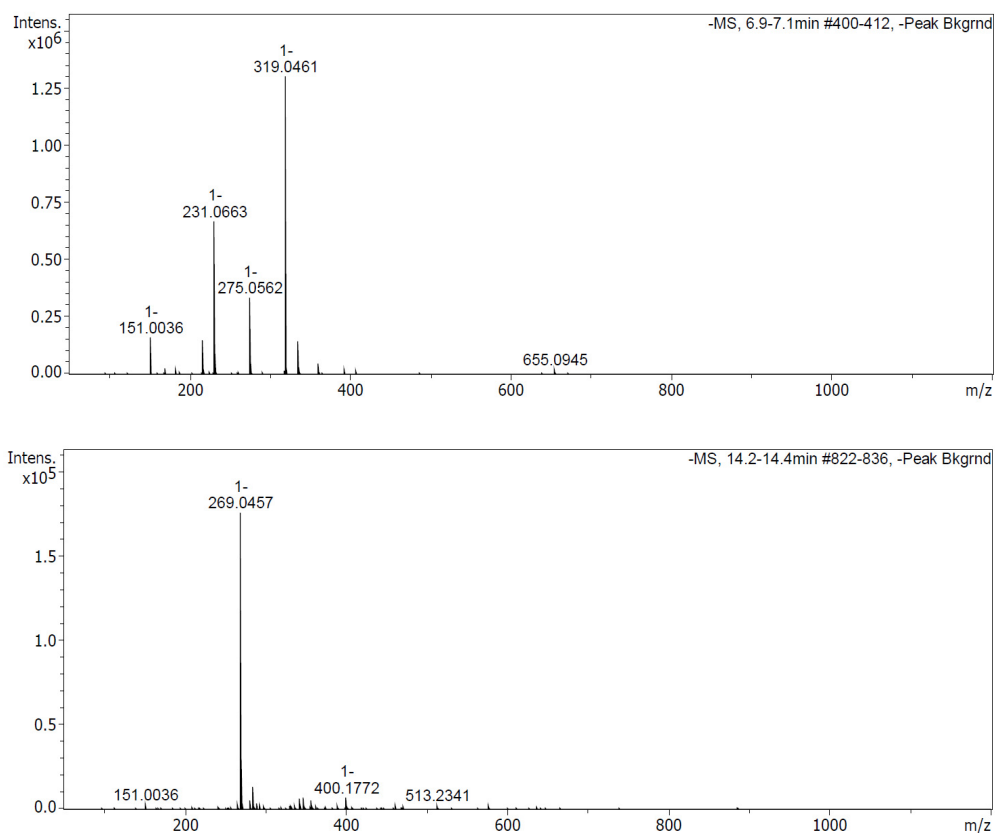

**Figure S1.** Mass spectrum corresponding to dihydromyricetin (top, peak 26, Rt: 7.00 min) and genistein (bottom, peak 52, Rt: 14.30) in D5 sub-fraction.

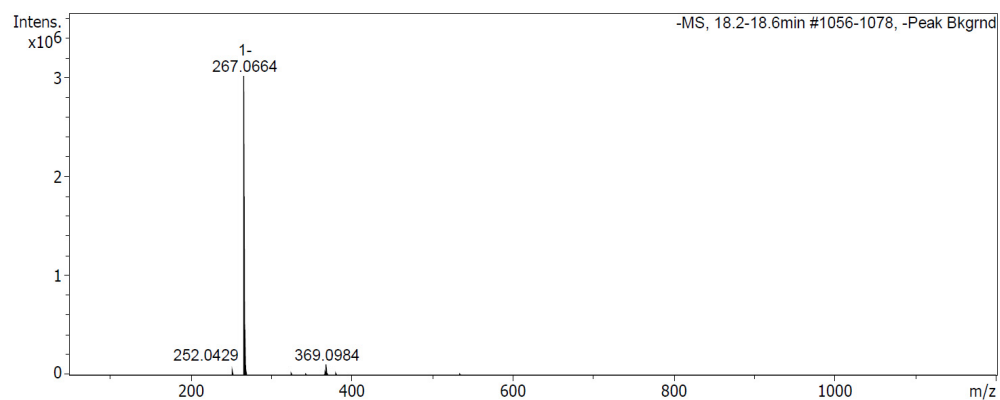

**Figure S2.** Mass spectrum corresponding to formononetin (peak 61, Rt: 18.40 min) in D7 sub-fraction.

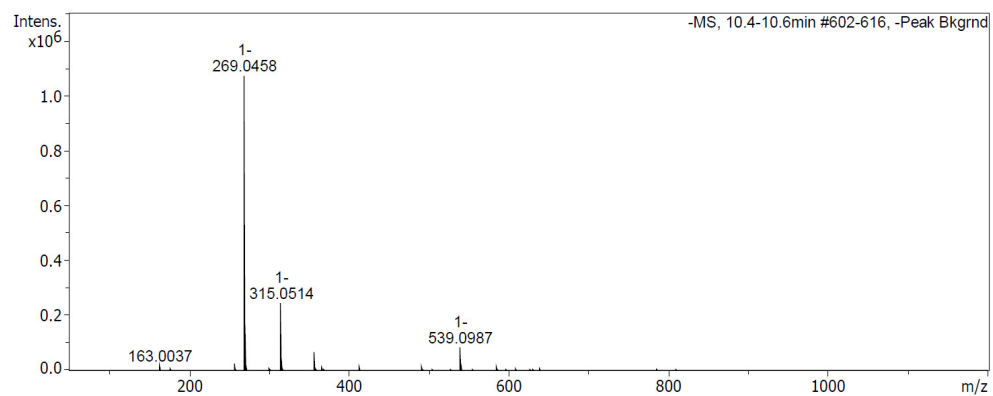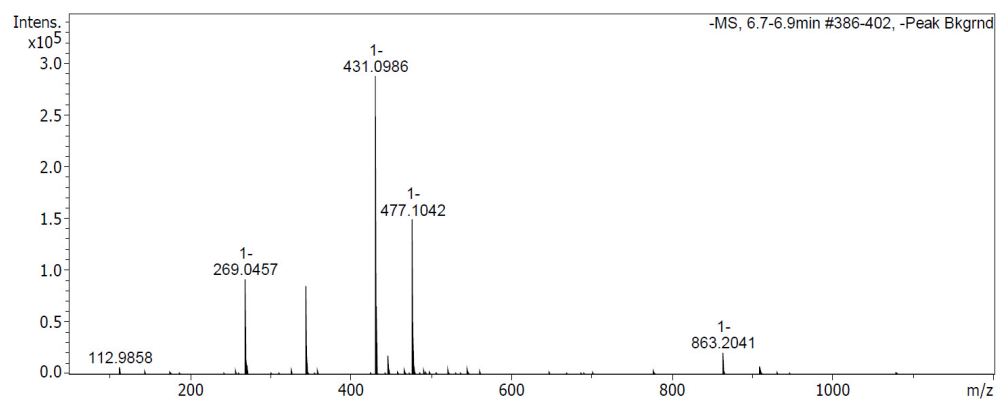

**Figure S3.** Mass spectrum corresponding to apigenin (top, peak 37, Rt: 10.50 min) and apigenin-4-O-glucoside (bottom, Rt: 6.87) in D8 sub-fraction.

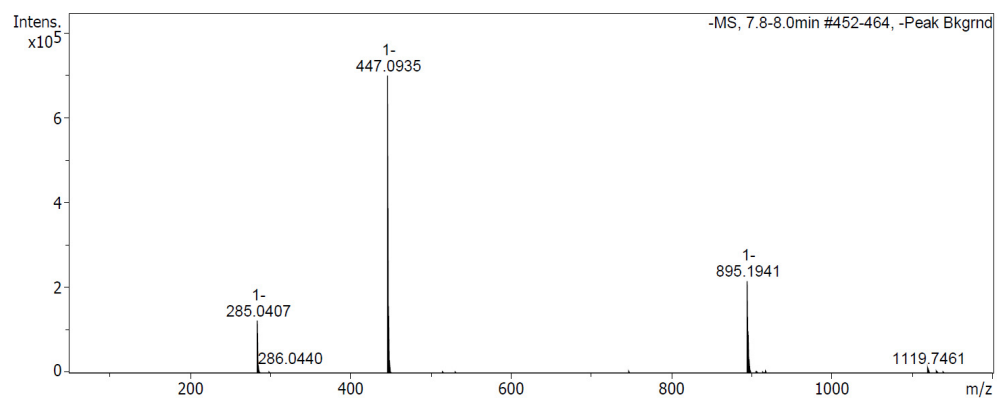

**Figure S4.** Mass spectrum corresponding to luteolin-4-O-glucoside (peak 10, Rt: 7.90 min) in M4 sub-fraction.
